# Supplementary material
Source: Research Square preprint supplement (doi:10.21203/rs.3.rs-9519659/v1)
Supplement: Supplementary file 1 [file 72d59d232fb875ca448926a7.docx]

**Supplementary Information**

**Interfacial engineering of rubber composites via metal coordination for superior mechanical performance**

Ke Liu1, Juan Liu1, Shihao Shang1, Xiangdong Hua1, Yuan Li1, Yanchun Han1, Xiansheng Jia2, Jianming Zhang1, Shouke Yan1, Zejun Zhang1, *, Yongxin Duan1, *

1Key Laboratory of Rubber-Plastics, Ministry of Education/Shandong Provincial Key Laboratory of Rubber-Plastics, State Key Laboratory of Advanced Optical Polymer and Manufacturing Technology, Qingdao University of Science & Technology, Qingdao, 266042, People's Republic of China.

2School of Electronic Science and Technology, Eastern Institute of Technology, Ningbo, 315211, People's Republic of China.

*To whom correspondence should be addressed. Email: [zzj@qust.edu.cn](mailto:zzj@qust.edu.cn); [dyx@qust.edu.cn](mailto:dyx@qust.edu.cn)

**This PDF file includes:**

Figures S1-15

Tables S1-8

References


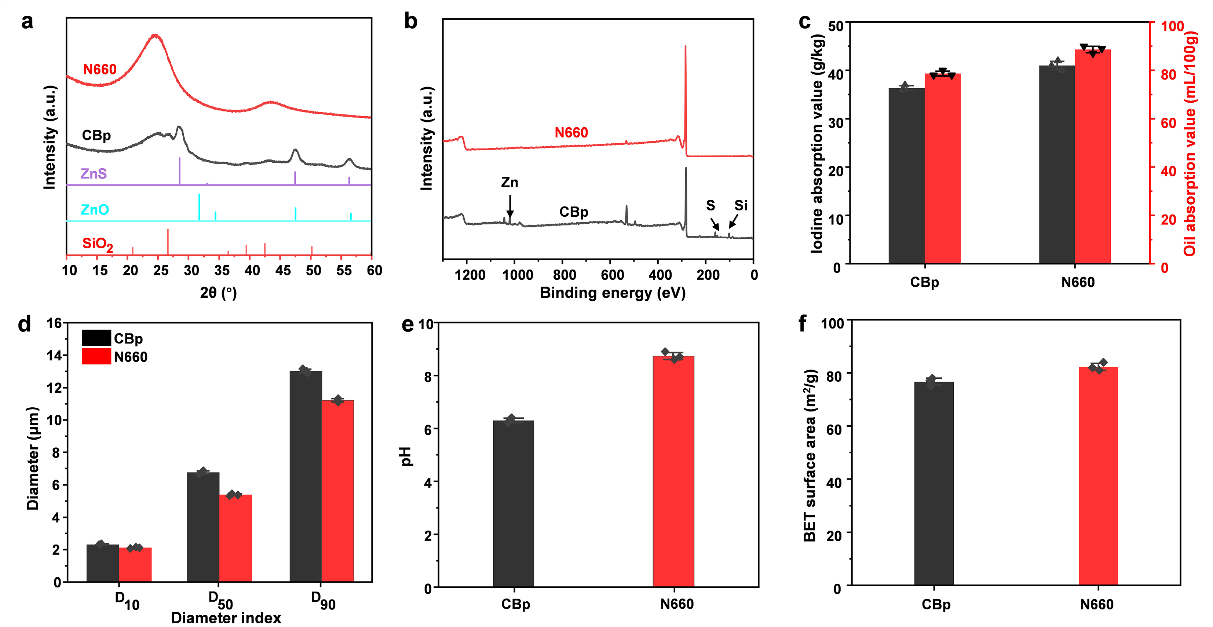


**Fig. S1. Physicochemical properties of CBp and N660.** a, XRD patterns of CBp and N660, showing that the main ash components on the surface of CBp are ZnS, ZnO, and SiO2. b, XPS spectra of CBp and N660, confirming that the main ash elements on the surface of CBp are S, Zn, and Si. c, Iodine adsorption value and oil absorption value of CBp and N660, indicating a lower structural degree of CBp compared with N660. d, Particle size of CBp and N660, showing that CBp has a larger particle size than N660. e, Surface pH values of CBp and N660, indicating an acidic surface for CBp and an alkaline surface for N660. f, BET specific surface area of CBp and N660, showing a larger specific surface area for N660.

**
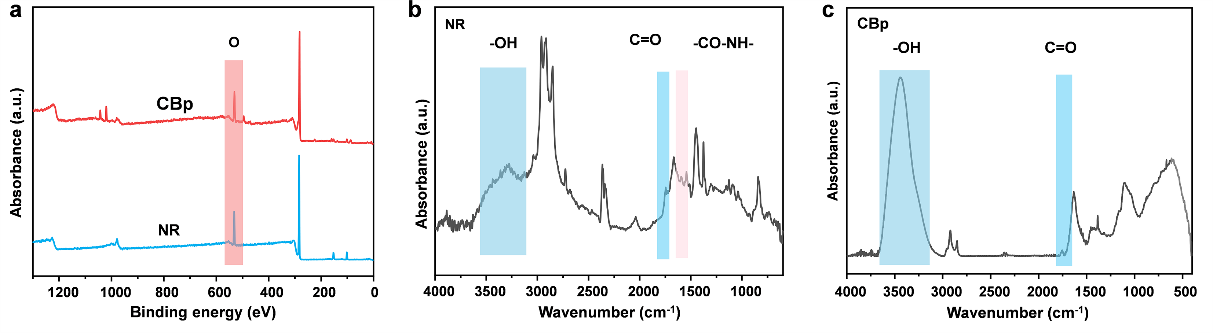
**

**Fig. S2. XPS spectra and FTIR spectra of CBp and NR.** **a**, XPS spectra of CBp and NR, indicating a relatively high oxygen content in both CBp (9.51 At%) and NR (12.64 At%). **b**, FTIR spectra of NR, showing that the oxygen-containing functional groups present in NR include -OH, C=O, and -CO-NH-. **c**, FTIR spectra of CBp, indicating that the oxygen-containing functional groups in CBp are mainly -OH and C=O.


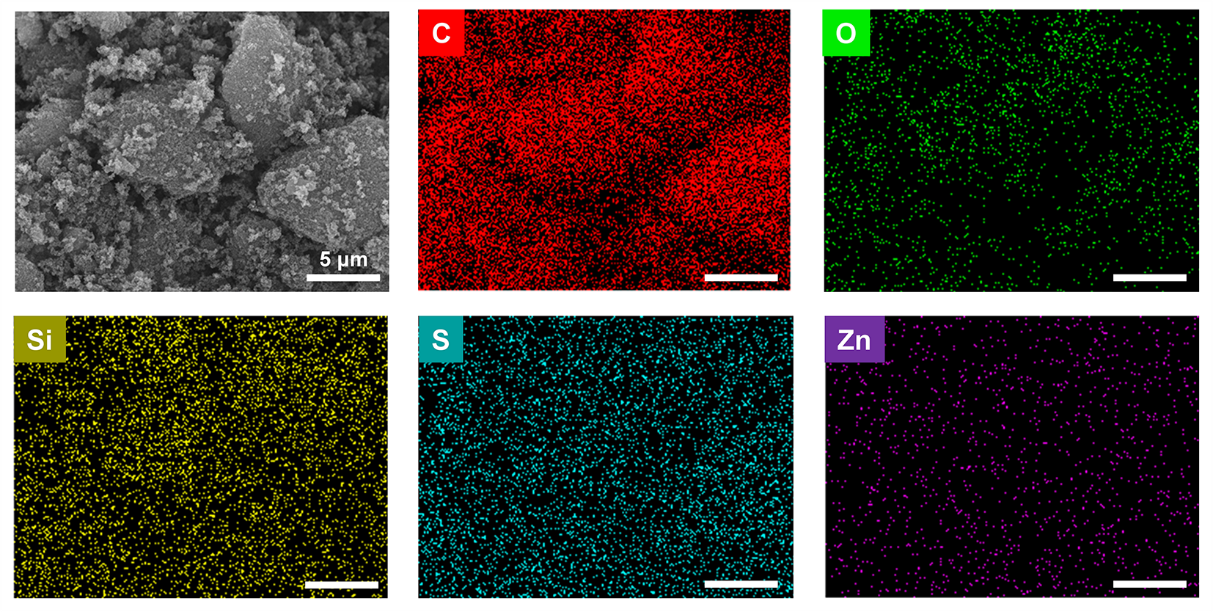


**Fig. S3. The SEM-EDS images of CBp.** Oxygen elements are uniformly distributed on the surface of CBp, which indicates that the oxygen functional groups in CBp are uniformly distributed.


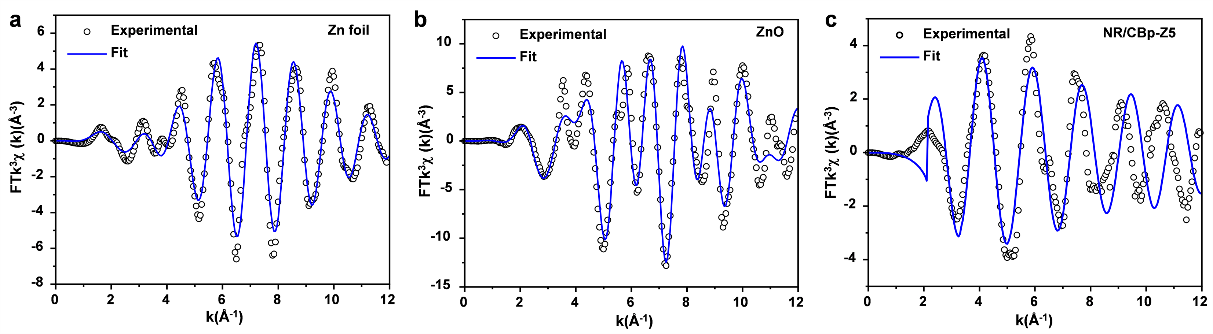


**Fig. S4. The EXAFS fitting curves in k-space.** The EXAFS fitting curves in K-space for **a**, Zn foil, **b**, ZnO, and **c**, NR/CBp-Z5.


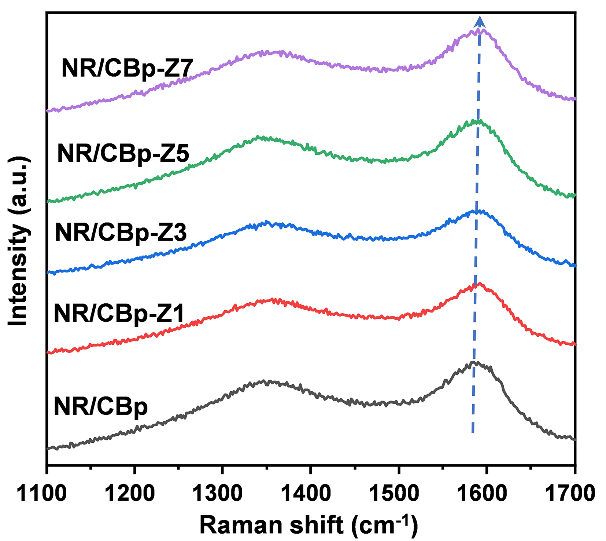


**Fig. S5. Raman spectra of NR/CBp and NR/CBp-Zn.** In the composites, the G-band gradually shifts from a lower wavenumber (1586 cm-1) to a higher one (1600 cm-1) with increasing Zn2+ content, indicating the formation of Zn2+ coordination bonds.


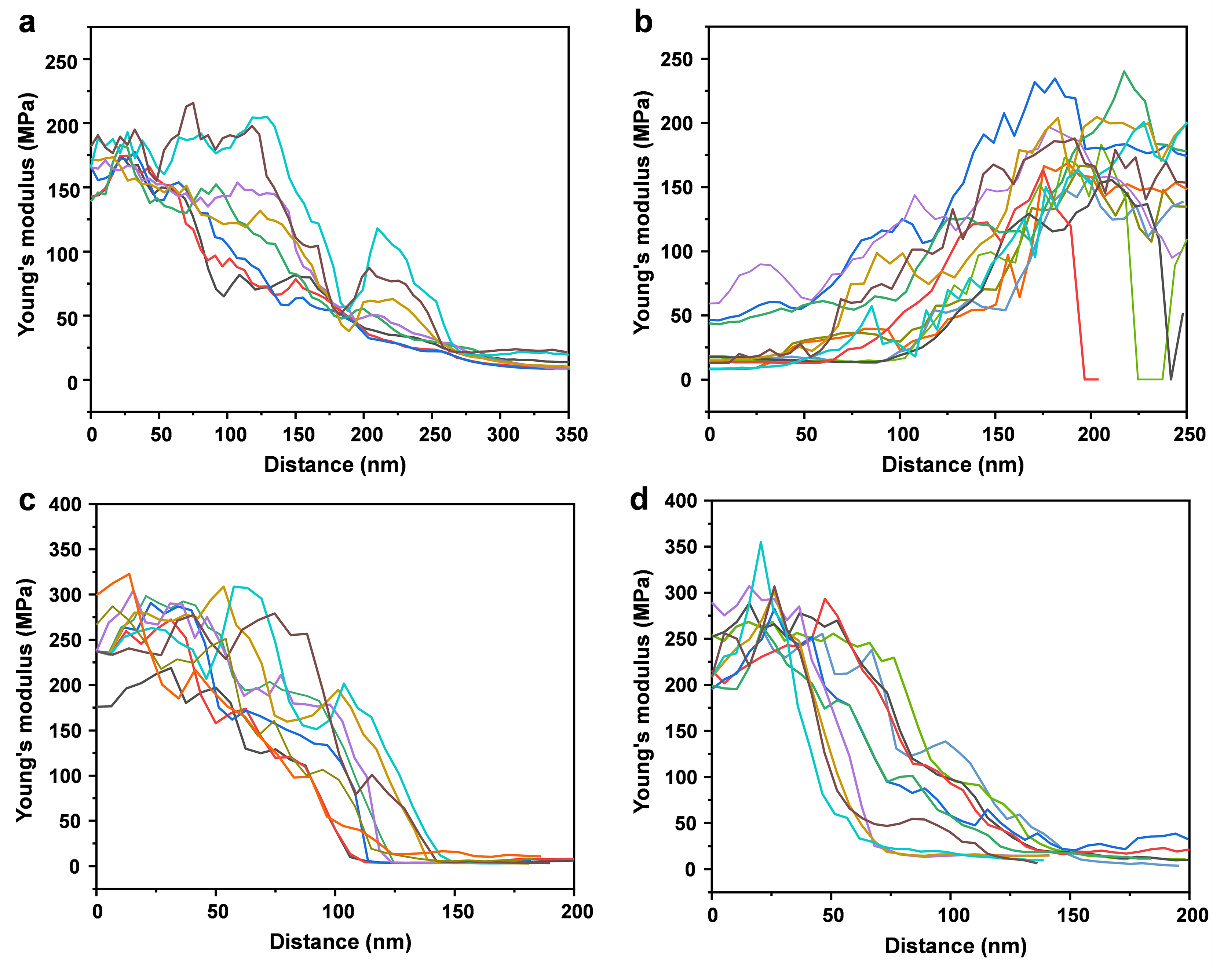


**Fig. S6. The corresponding Young’s modulus-displacement curve from rubber matrix to CBp across interphase.** **a, b**, The corresponding Young’s modulus-displacement curve of NR/CBp-Z5. **c, d**, The corresponding Young’s modulus-displacement curve of NR/CBp. This indicates that the NR/CBp-Z5 composite possesses a thicker interfacial layer compared with NR/CBp.


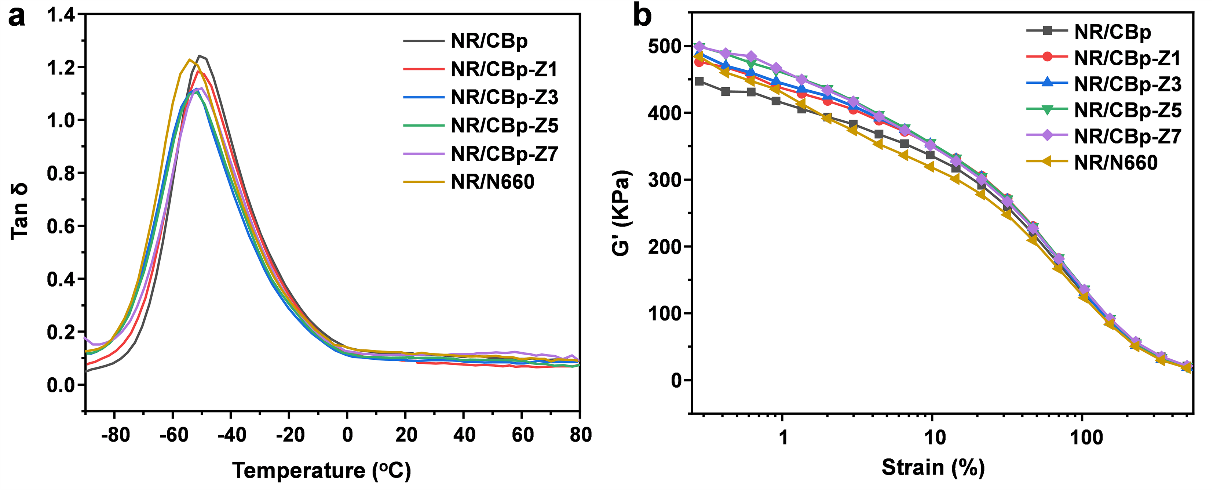


**Fig. S7. The loss factor (Tan δ) and RPA of NR/CBp, NR/CBp-Zn, and NR/N660. a**, The loss factor (Tan δ) of NR/CBp, NR/CBp-Zn, and NR/N660. With increasing Zn2+ content, the loss factor gradually decreases. **b**, The RPA of NR/CBp, NR/CBp-Zn, and NR/N660. With increasing Zn2+ content, the storage modulus (G’) gradually increases.


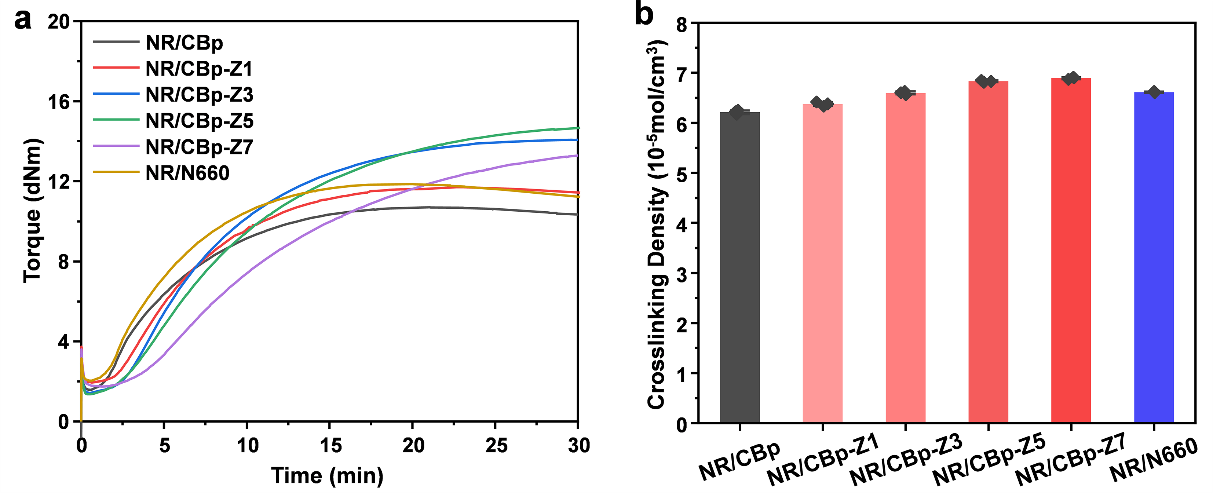


**Fig. S8. The Curing curves and crosslinking density of NR/CBp, NR/CBp-Zn, and NR/N660.** **a**, The Curing curves of NR/CBp, NR/CBp-Zn, and NR/N660. With increasing Zn2+ content, the maximum torque (MH) first increases and then decreases, while the curing time gradually lengthens. **b**, The crosslinking density of NR/CBp, NR/CBp-Zn, and NR/N660. With increasing Zn2+ content, the crosslinking density gradually increases.


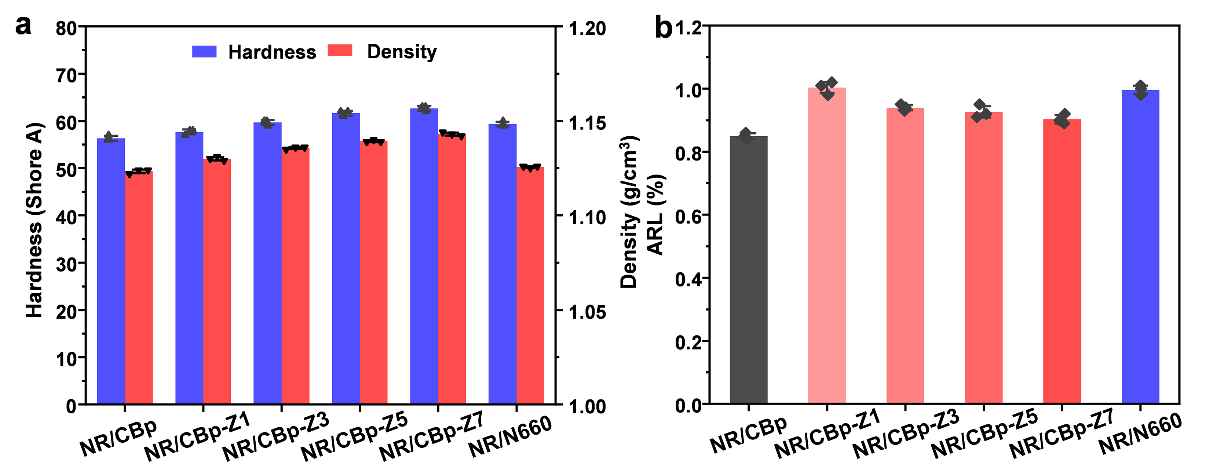


**Fig. S9. The Hardness, density, and DIN abrasion of NR/CBp, NR/CBp-Zn, and NR/N660.** **a**, The Hardness, and density, of NR/CBp, NR/CBp-Zn, and NR/N660. With increasing Zn2+ content, both hardness and density gradually increase. **b**, The DIN abrasion of NR/CBp, NR/CBp-Zn, and NR/N660.With increasing Zn2+ content, the wear coefficient first increases and then decreases.


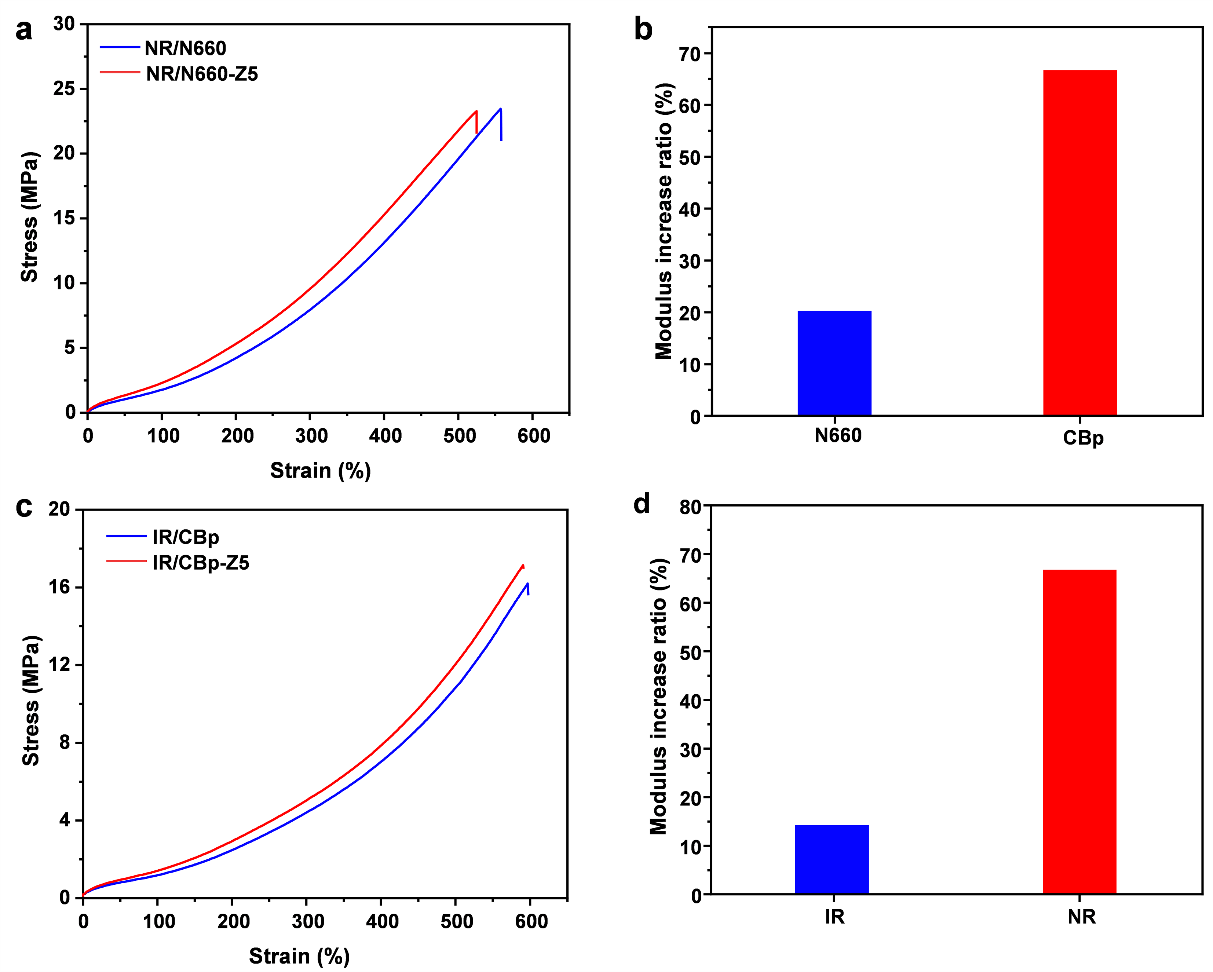


**Fig. S10. The application of Zn2+ in the NR/N660 and IR/CBp systems.** **a**, Stress-strain curves of the NR/N660 and NR/N660-Z5 composites. Zn2+ contributes only a minimal enhancement to the tensile properties of the NR/N660 system. **b**, The enhancement ratios of the modulus at 300% strain conferred by Zn2+ on the NR/N660 and NR/CBp systems. Zn2+ provides a significantly greater enhancement in modulus to the NR/CBp system than to the NR/N660 system. **c**, Stress-strain curves of the IR/CBp and IR/CBp-Z5 composites. Zn2+ provides essentially no enhancement to the tensile properties of the IR/CBp system. **d**, The enhancement ratios of the modulus at 300% strain conferred by Zn2+ on the IR/CBp and NR/CBp systems. Zn2+ provides a significantly greater enhancement in modulus to the NR/CBp system than to the IR/CBp system.


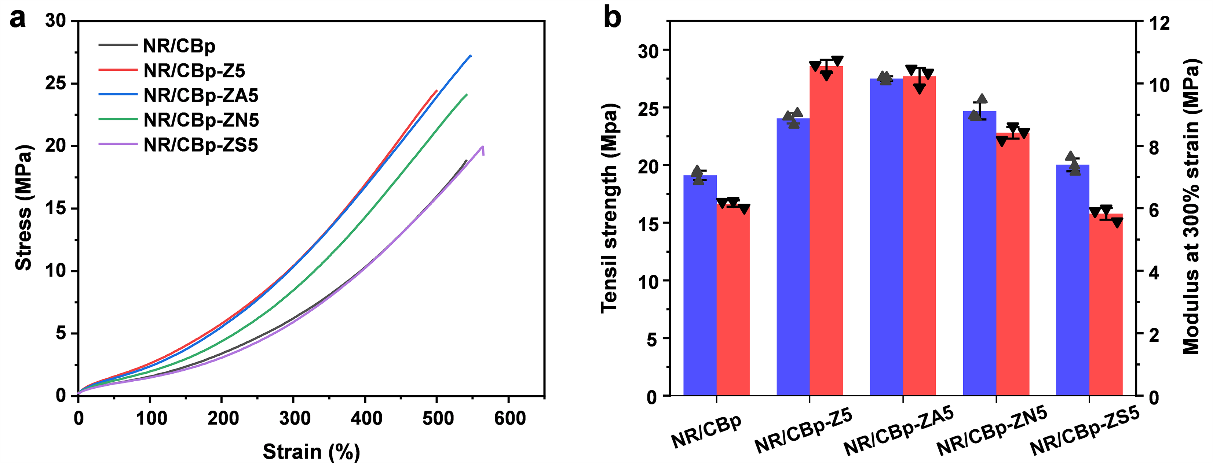


**Fig. S11. Effect of different zinc salts on the tensile properties of NR/CBp composites. a**,(a) Stress-strain curves of NR/CBp and zinc salt-modified composites, including NR/CBp-Z5 (ZnCl2), NR/CBp-ZA5 (Zn (Ac)2), NR/CBp-ZN5 (Zn (NO3)2·6H2O), and NR/CBp-ZS5 (ZnSO4·7H2O). **b**, Corresponding tensile strength (left axis) and modulus at 300% strain (right axis). The incorporation of zinc salts significantly influences the reinforcement behavior of CBp in the NR matrix, leading to variations in stress–strain response, tensile strength, and modulus depending on the zinc salt species. It can be clearly observed that zinc chloride and zinc acetate exhibit the most pronounced enhancement in tensile performance, followed by zinc nitrate hexahydrate, whereas zinc sulfate heptahydrate shows little to no improvement compared with the unmodified composite.


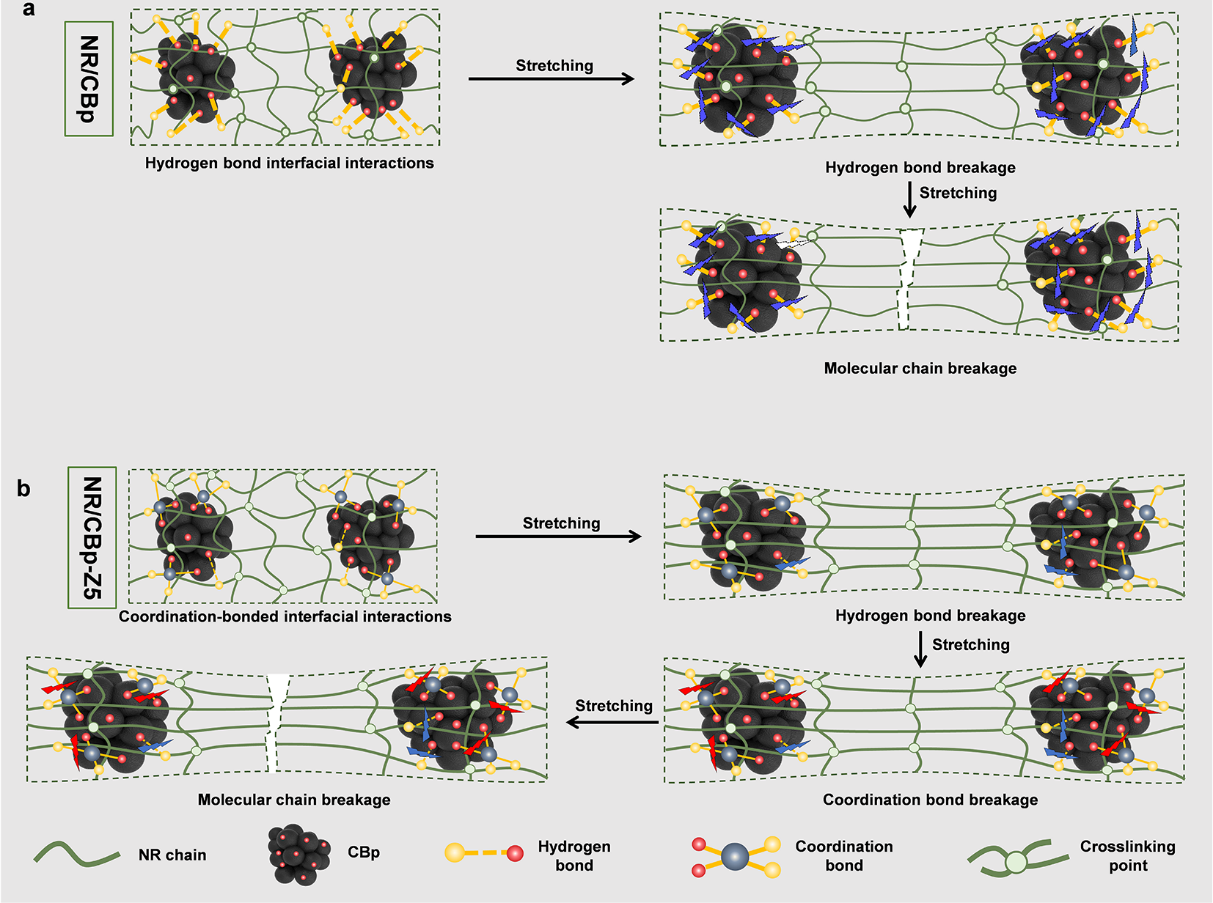


**Fig. S12.** **Proposed fracture mechanism of the NR/CBp and NR/CBp-Z5 composites. a**, Proposed fracture mechanism of the NR/CBp composites. Initially, the NR molecular chains are cross-linked and entangled with each other, and are bonded to CBp through hydrogen bonds. Upon initial loading, the rubber chains begin to uncoil and extend, during which the weak hydrogen bonds between the chains and carbon black particles progressively break. As the loading further increases, fracture of the NR molecular chains occurs. **b**, Proposed fracture mechanism of the NR/CBp-Z5 composites. In contrast, in NR/CBp-Z5 composites, the NR molecular chains are bonded to CBp through both strong metal-coordination interactions and hydrogen bonds. Upon initial loading, the rubber chains begin to uncoil and elongate, during which the weak hydrogen bonds between the chains and carbon black particles progressively break. As the loading further increases, the strong coordination bonds start to rupture, releasing a substantial amount of energy during this stage. Ultimately, fracture of the natural rubber molecular chains occurs.


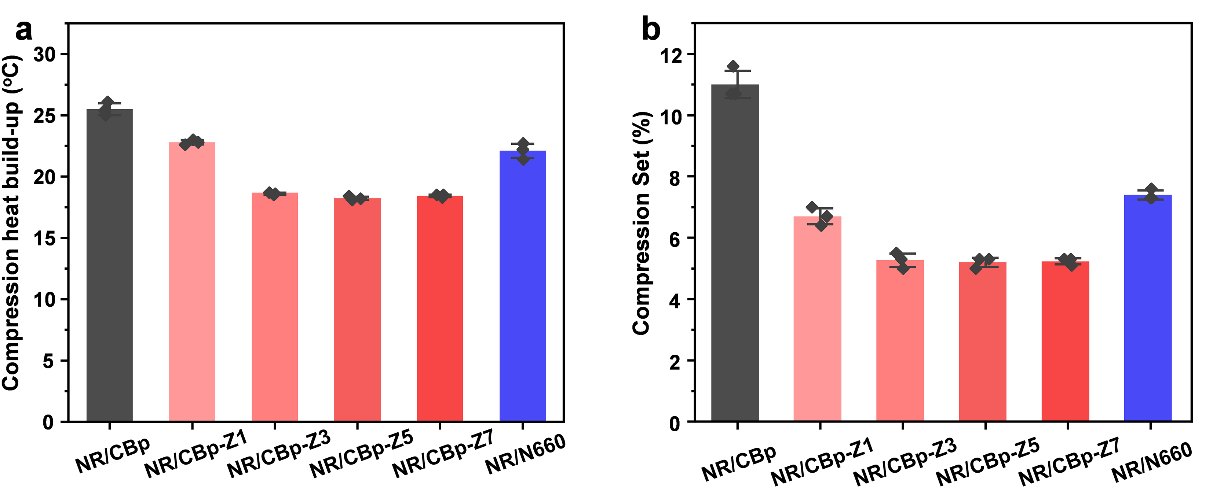


**Fig. S13. Compression heat generation and compression permanent deformation of NR/CBp, NR/CBp-Zn, and NR/N660.** The improvement of the interfacial interaction between CBp and NR contributes to reducing heat generation during **a**, compression heat generation. Moreover, this also enhances the deformation resistance of the composite material, thereby facilitating a reduction in **b**, compression permanent deformation.


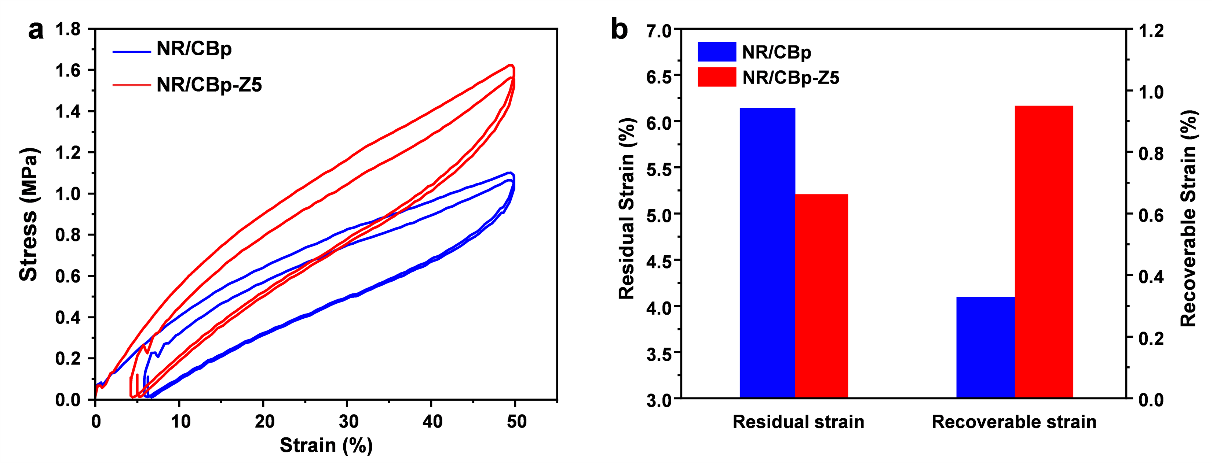


**Fig. S14. The cyclic tensile behavior of NR/CBp and NR/CBp-Z5** **composites. a**,The first-cycle tensile curves of NR/CBp and NR/CBp-Z5 composites. **b**, The residual strain and deformation after one cycle of NR/CBp and NR/CBp-Z5 composites. Compared to the NR/CBp composite, the NR/CBp-Z5 composite exhibits smaller residual strain and larger recoverable strain, indicating a stronger resistance to deformation in the tensile direction.

**
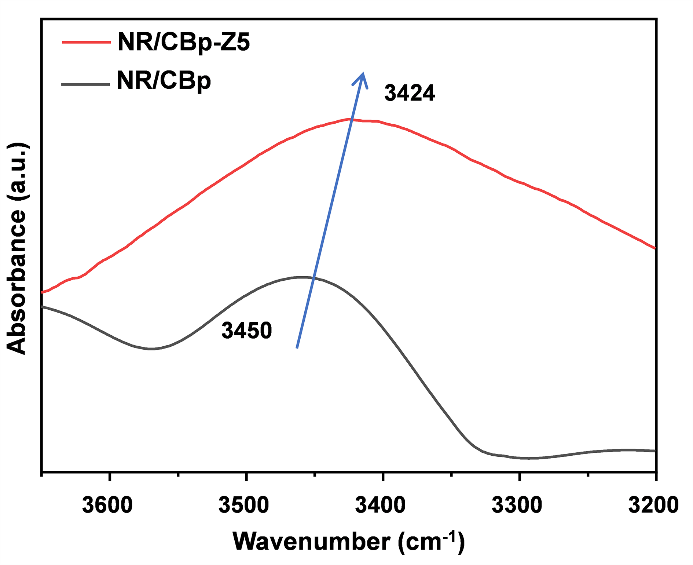
**

**Fig. S15. The FTIR spectra of NR/CBp and NR/CBp-Z5 composites.** Compared with the NR/CBp composite, the –OH absorption peak in the NR/CBp-Z5 composite becomes stronger and shifts from 3450 cm-1 to 3424 cm-1, which is attributed to the formation of Zn2+ coordination bonds.

**Table S1.** Elemental composition of CBp and NR

| **Samples** | **C (At%)** | **O (At%)** | **N (At%)** | **Others (At%)** |
| --- | --- | --- | --- | --- |
| **CBp** | 84.45 | 9.51 | - | 6.04 |
| **NR** | 84.63 | 12.64 | 1.94 | 0.79 |

**Table S2.** Tensile strength of the CBp/NR-Z5 composites compared with other CBp-reinforced rubber systems

| **Number** | **Classification** | **Materials** | **Tensile Strength (MPa)** | **Improvement (%)** | **Reference** |
| --- | --- | --- | --- | --- | --- |
| **1** | Physical grinding | NR/CBp | 15.0 | 10.6 | (18) |
| **2** | NR/mCBp | 16.6 |
| **3** | NR/CBp | 23.3 | 9.8 | (26) |
| **4** | NR/mCBp | 25.6 |
| **5** | Acid/alkali treatment | NR/CBp | 13.9 | 7.9 | (28) |
| **6** | NR/CBp-HCl | 15.0 |
| **7** | SBR/CBp | 14.1 | 24.1 | (17) |
| **8** | SBR/dCBp | 17.5 |
| **9** | NR/CBp | 18.3 | 20.7 | (29) |
| **10** | NR/CBp-HCl-KOH | 22.1 |
| **11** | Plasma treatment | NR/CBp | 16.7 | 2.4 | (19) |
| **12** | NR/CBp-NH3 | 17.1 |
| **13** | NR/CBp | 16.7 | 3.0 |
| **14** | NR/CBp-Ar | 17.2 |
| **15** | Coupling agent | NR/CBp | 16.2 | 14.2 | (27) |
| **16** | NR/CBp/WPC | 18.5 |
| **17** | NR/CBp | 22.4 | 16.1 | (5) |
| **18** | NR/CBp/C2 | 26.0 |
| **19** | This work | NR/CBp | 19.1 | 26.7 | This work |
| **20** | NR/CBp-Z5 | 24.2 |
| **21** | NR/N660 | 20.9 |  |

**Table S3.** EXAFS fitting parameters at the Zn and Fe K-edge (Ѕ0 = 1) of as-prepared samples in this work

| **Sample** | **Path** | **C.N.** | **R(Å)** | **σ2×10-3(Å2)** | **ΔE0(eV)** | **R factor** |
| --- | --- | --- | --- | --- | --- | --- |
| **Zn foil** | Zn-Zn | 6* | 2.66 ± 0.01 | 12.4 ± 0.9 | -0.9 ± 0.9 | 0.01 |
| **ZnO** | Zn-O | 2.7 ± 0.4 | 1.96 ± 0.01 | 1.7 ± 0.1 | -1.0 ± 0.8 | 0.02 |
| Zn-Zn | 11.6 ± 2.1 | 4.32 ± 0.03 | 3.2 ± 1.5 |
| **NR/CBp-Z5** | Zn-O | 3.9 ± 1.2 | 1.99 ± 0.03 | 2.8 ± 1.6 | 5.9 ± 2.2 | 0.02 |

**Table S4.** Mechanical properties of NR/CBp, NR/CBp-Zn and NR/N660 composites

| **Samples** | **Tensile Strength (MPa)** | **Tensile strength improvement (%)** | **Toughness**  **(KJ·m-3)** | **Toughness improvement (%)** |
| --- | --- | --- | --- | --- |
| **NR/CBp** | 19.1 ± 0.4 | - | 3.81 ± 0.03 | - |
| **NR/CBp-Z1** | 22.5 ± 0.2 | 17.8 | 4.33 ± 0.05 | 13.6 |
| **NR/CBp-Z3** | 23.7 ± 0.9 | 24.1 | 4.79 ± 0.01 | 25.7 |
| **NR/CBp-Z5** | 24.2 ± 0.4 | 26.7 | 4.79± 0.01 | 25.7 |
| **NR/CBp-Z7** | 22.5 ± 0.9 | 17.8 | 4.36 ± 0.06 | 14.4 |
| **NR/N660** | 20.9 ± 0.3 | - | 3.99 ± 0.03 | - |

**Table S5.** Modulus at 100%, 200%, 300% strain of NR/CBp, NR/CBp-Zn and NR/N660 composites

| **Samples** | **Modulus at 100% (MPa)** | **Modulus at 200% (MPa)** | **Modulus at 300% (MPa)** | **Modulus at 300% improvement (%)** |
| --- | --- | --- | --- | --- |
| **NR/CBp** | 1.56 ± 0.01 | 3.52 ± 0.18 | 6.15 ± 0.12 | - |
| **NR/CBp-Z1** | 1.99 ± 0.01 | 4.53 ± 0.04 | 8.12 ± 0.21 | 32.0 |
| **NR/CBp-Z3** | 2.49 ± 0.02 | 5.59 ± 0.07 | 10.09 ± 0.13 | 64.1 |
| **NR/CBp-Z5** | 2.59 ± 0.01 | 5.84 ± 0.08 | 10.54 ± 0.21 | 71.4 |
| **NR/CBp-Z7** | 2.46 ± 0.04 | 5.75 ± 0.06 | 10.43 ± 0.03 | 69.6 |
| **NR/N660** | 1.93 ± 0.02 | 4.30 ± 0.11 | 7.72 ± 0.28 | - |

**Table S6.** Tear Strength of NR/CBp, NR/CBp-Zn and NR/N660 composites

| **Samples** | **Tear Strength (MPa)** | **Tear Strength improvement (%)** |
| --- | --- | --- |
| **NR/CBp** | 28.1 ± 0.7 | - |
| **NR/CBp-Z1** | 35.9 ± 1.1 | 27.8 |
| **NR/CBp-Z3** | 42.9 ± 1.5 | 52.6 |
| **NR/CBp-Z5** | 45.2 ± 0.4 | 60.9 |
| **NR/CBp-Z7** | 44.5 ± 1.4 | 58.4 |
| **NR/N660** | 36.5 ± 1.3 | - |

**Table S7.** Formulations of the NR/CBp, NR/CBp-Zn and NR/N660 composites

| **Component** | **NR CV60/IR** | **CBp/N660** | **SA** | **ZnO** | **DM** | **S** | **ZnCl2** |
| --- | --- | --- | --- | --- | --- | --- | --- |
| **phr** | 100 | 50 | 3 | 5 | 0.6 | 2.5 | 0/1/3/5/7 |

**Table S8.** Sulfur characteristic parameters of the NR/CBp, NR/CBp-Zn and NR/N660 composites

| **Parameters** | **NR/CBp** | **NR/CBp-Z1** | **NR/CBp-Z3** | **NR/CBp-Z5** | **NR/CBp-Z7** | **NR/N660** |
| --- | --- | --- | --- | --- | --- | --- |
| **ML（dN·M）** | 1.51 | 1.94 | 1.57 | 1.51 | 1.75 | 1.61 |
| **MH（dN·M）** | 10.71 | 11.87 | 14.08 | 14.83 | 13.29 | 11.87 |
| **MH-ML（dN·M）** | 9.20 | 9.93 | 12.51 | 13.32 | 11.54 | 10.56 |
| **T10 （min）** | 1.85 | 2.81 | 3.12 | 3.23 | 4.44 | 2.24 |
| **T90 （min）** | 12.80 | 13.58 | 16.62 | 20.34 | 23.15 | 12.24 |

**References**

1. Miyata T, Watanabe D, Kanomi S, Chen K, Miyoshi W, Kikuchi T, Kitaura T, Kawakatsu T, Jinnai H (2025) Self-reinforcement in filled rubber via strain-induced crystallisation. Nat Commun 16, 8073. https://doi.org/10.1038/s41467-025-63283-8

2. Duan H, Duan X, Miao X, Cheng H, Liang C, Zhao G, Liu Y, Cheng S (2024) Synergistically improving mechanical properties and lowering build-up heat in natural rubber tires through nano-zinc oxide on graphene oxide and strong cross-linked interfaces derived from thiol-ene click reaction. Adv Compos Hybrid Mater 7, 7. https://doi.org/10.1007/s42114-023-00817-y

3. Nian G, Chen Z, Bao X, Tan MWM, Kutsovsky Y, Suo Z (2025) Natural rubber with high resistance to crack growth. Nat Sustain 8, 692-701. https://doi.org/10.1038/s41893-025-01559-z

4. Zhang GJ, Jiang Y, Wang SF, Zhang Y (2023) Influence of a novel coupling agent on the performance of recovered carbon black filled natural rubber. Compos Part B: Eng 255, 110614. https://doi.org/10.1016/j.compositesb.2023.110614

5. Anupabphan T, Narischat N, Theinnoi K, Hartley UW, Wongkhorsub C (2025) Chemical process enhancement of pyrolytic carbon black from waste tires. ACS Omega 10, 42451-42460. https://doi.org/10.1021/acsomega.5c02908

6. Towell SE, Ratushnyy M, Cooke LS, Lewis GM, Zhukhovitskiy AV (2025) Deconstruction of rubber via C–H amination and aza-Cope rearrangement. Nature 640, 384-389. https://doi.org/10.1038/s41586-025-08716-6

7. Hrdlička Z, Brejcha J, Otruba J, Skočilas J, Štancl J, Kadeřábková A, Čadek D, Krmela J, Krmelová V (2025) Microwave activation of ground tyre rubber and its application in off-road tyre tread formulation. Adv Compos Hybrid Mater 8, 105. https://doi.org/10.1007/s42114-024-01179-9

8. Zhang G, Peng J, Wang H, Lu Y, Zhang Y (2024) Curing and reinforcement effect of recovered carbon black from waste tires on brominated butyl rubber. Compos Sci Technol 258, 110879. https://doi.org/10.1016/j.compscitech.2024.110879

9. Sagar M, Nibedita K, Manohar N, Kumar KR, Suchismita S, Pradnyesh A, Reddy AB, Sadiku ER, Gupta UN, Lachit P, Jayaramudu J (2018) A potential utilization of end-of-life tyres as recycled carbon black in EPDM rubber. Waste Manage 74, 110-122. https://doi.org/10.1016/j.wasman.2018.01.003

10. Mubari PK, Weiss-Hortala E, Monthioux M, Moyano S, Bowles A, Fowler G, Moulin L, Puech P (2024) Analysing the modifications of carbon black and other fillers after pyrolysis of model tyres. Sustainable Mater Technol 40, e00904. https://doi.org/10.1016/j.susmat.2024.e00904

11. Ge Y, Diao P, Li X, Zhou Y, Xu Z, Bian H, Xiao Y, Wang C (2024) Application of DPG/KH550 modified pyrolysis carbon black in oil and high temperature-resistant NBR composites. J Appl Polym Sci 142, e56377. https://doi.org/10.1002/app.56377

12. Diby ICP, Atheba PG, Kaliaguine S (2022) Controlled air oxidation for surface functionalization of pyrolytic carbon black. Ind Eng Chem Res 61, 13805-13815. https://doi.org/10.1021/acs.iecr.2c01092

13. Cardona-Uribe N, Betancur M, Martínez JD (2021) Towards the chemical upgrading of the recovered carbon black derived from pyrolysis of end-of-life tires. Sustainable Mater Technol 28, e00287. https://doi.org/10.1016/j.susmat.2021.e00287

14. Zhang X, Li HX, Cao Q, Jin LE, Wang FM (2018) Upgrading pyrolytic residue from waste tires to commercial carbon black. Waste Manage Res 36, 436-444. https://doi.org/10.1177/0734242x18764292

15. Xu JQ, Yu JX, Xu JL, Sun CL, He WZ, Huang JW, Li GM (2020) High-value utilization of waste tires: a review with focus on modified carbon black from pyrolysis. Sci Total Environ 742, 140235. https://doi.org/10.1016/j.scitotenv.2020.140235

16. Jiang G, Pan J, Deng W, Sun Y, Guo J, Che K, Yang Y, Lin Z, Sun Y, Huang C, Zhang T (2022) Recovery of high pure pyrolytic carbon black from waste tires by dual acid treatment. J Clean Prod 374, 133893. https://doi.org/10.1016/j.jclepro.2022.133893

17. Martínez JD, Cardona-Uribe N, Murillo R, García T, López JM (2019) Carbon black recovery from waste tire pyrolysis by demineralization: Production and application in rubber compounding. Waste Manage 85, 574-584. https://doi.org/10.1016/j.wasman.2019.01.016

18. Yang F, Liang S, Wu HP, Yue CY, Yan HY, Wu H, Chen XY, Zhang JM, Yan SK, Duan YX (2022) Upgrading the pyrolysis carbon black from waste tire by hybridization with cellulose. Ind Eng Chem Res 61, 6512-6520. https://doi.org/10.1021/acs.iecr.2c00601

19. Ma YJ, Zhao HY, Zhang XJ, Fan CY, Zhuang T, Sun C, Zhao SG (2022) Structure optimization of pyrolysis carbon black from waste tire and its application in natural rubber composites. Appl Surf Sci 593, 153389. https://doi.org/10.1016/j.apsusc.2022.153389

20. Lichtenegger HC, Schöberl T, Bartl MH, Waite H, Stucky GD (2002) High abrasion resistance with sparse mineralization: copper biomineral in worm jaws. Science 298, 389-392. https://doi.org/doi:10.1126/science.1075433

21. Harrington MJ, Masic A, Holten-Andersen N, Waite JH, Fratzl P (2010) Iron-clad fibers: a metal-based biological strategy for hard flexible coatings. Science 328, 216-220. https://doi.org/doi:10.1126/science.1181044

22. Filippidi E, Cristiani TR, Eisenbach CD, Waite JH, Israelachvili JN, Ahn BK, Valentine MT (2017) Toughening elastomers using mussel-inspired iron-catechol complexes. Science 358, 502-505. https://doi.org/doi:10.1126/science.aao0350

23. Huang J, Fan J, Cao L, Xu C, Chen Y (2020) A novel strategy to construct co-continuous PLA/NBR thermoplastic vulcanizates: Metal-ligand coordination-induced dynamic vulcanization, balanced stiffness-toughness and shape memory effect. Chem Eng J 385, 123828. https://doi.org/10.1016/j.cej.2019.123828

24. Yu S, Tang Z, Wang D, Guo B, Zhang L (2024) Toughening rubber by in situ construction of hierarchical coordination complexes with a sulfur-based ionomer. Macromolecules 57, 10120-10129. https://doi.org/10.1021/acs.macromol.4c01907

25. Soroush E, Alibakhshi E, Malekli M, Ramezanpour J, Ramezanzadeh B, Eivaz Mohammadloo H (2025) Advances in hybrid organic–inorganic coordination complexes (HOICCs) as a new generation of smart anti-corrosive materials. Adv Compos Hybrid Mater 8, 444. https://doi.org/10.1007/s42114-025-01503-x

26. Zhao S, Tang D, Fang Y, Hao X, Liu Y, Liu J, Zhao H, Sun C, Hua C, Schlarb AK, Lin L (2023) Enhanced wear resistance of sustainable tire materials with plasma modified pyrolysis carbon black. Carbon 213, 118201. https://doi.org/https://doi.org/10.1016/j.carbon.2023.118201

27. Zhou J, Yu T, Wu S, Xie Z, Yang Y (2010) Inverse gas chromatography investigation of rubber reinforcement by modified pyrolytic carbon black from scrap tires. Ind Eng Chem Res 49, 1691-1696. https://doi.org/10.1021/ie9009217

28. Zhong RP, Xu JJ, Hui D, Bhosate SS, Hong RY (2020) Pyrolytic preparation and modification of carbon black recovered from waste tyres. Waste Manage Res 38, 35-43. https://doi.org/10.1177/0734242x19869987

29. Xie L, Zhou P, Chen X, Duan P-G (2026) Strategic purification and activation of waste-tire-derived pyrolytic carbon black for enhanced natural rubber reinforcement: Mechanistic insights and practical considerations. Waste Manage 213, 115358. https://doi.org/https://doi.org/10.1016/j.wasman.2026.115358

30. Guo X, Fang G, Li G, Ma H, Fan H, Yu L, Ma C, Wu X, Deng D, Wei M, Tan D, Si R, Zhang S, Li J, Sun L, Tang Z, Pan X, Bao X (2014) Direct, nonoxidative conversion of methane to ethylene, aromatics, and hydrogen. Science 344, 616-619. https://doi.org/doi:10.1126/science.1253150

31. Liu P, Zhao Y, Qin R, Mo S, Chen G, Gu L, Chevrier DM, Zhang P, Guo Q, Zang D, Wu B, Fu G, Zheng N (2016) Photochemical route for synthesizing atomically dispersed palladium catalysts. Science 352, 797-800. https://doi.org/doi:10.1126/science.aaf5251

32. Wan S, Xu F, Jiang L, Cheng Q (2017) Superior fatigue resistant bioinspired graphene‐based nanocomposite via synergistic interfacial interactions. Adv Funct Mater 27, 1605636. https://doi.org/10.1002/adfm.201605636

33. Zhang Z, Zheng L, Huang W, Cheng Q (2024) Improving strength and toughness of graphene film through metal ion bridging. Proc Natl Acad Sci 121, e2322663121. https://doi.org/doi:10.1073/pnas.2322663121

34. Liu K, Hu J, Kong Z, Hu J, Tian Z, Hou J, Qin J, Liu C, Liang S, Wu H, Zhang J, Zong L, Duan Y (2021) High-yield, high-conductive graphene/nanocellulose hybrids prepared by co-exfoliation of low-oxidized expanded graphite and microfibrillated cellulose. Compos Part B: Eng 225, 109250. https://doi.org/10.1016/j.compositesb.2021.109250

35. Wang D, Russell TP, Nishi T, Nakajima K (2013) Atomic force microscopy nanomechanics visualizes molecular diffusion and microstructure at an interface. ACS Macro Letters 2, 757-760. https://doi.org/10.1021/mz400281f

36. Tian C, Cui J, Ning N, Zhang L, Tian M (2022) Quantitative characterization of interfacial properties of carbon black/elastomer nanocomposites and mechanism exploration on their interfacial interaction. Compos Sci Technol 222, 109367. https://doi.org/10.1016/j.compscitech.2022.109367

37. Liu K, Kong Z, Han Y, Zhang L, Liu J, Sun H, Li F, Yan S, Midhun Dominic CD, Wu H, Zong L, Zhang J, Duan Y (2024) Upgrading pyrolysis carbon black by recyclable ferrate/alkaline treatment with the assistance of ultrasound. J Clean Prod 482, 144165. https://doi.org/10.1016/j.jclepro.2024.144165

38. Wan S, Li X, Wang Y, Chen Y, Xie X, Yang R, Tomsia AP, Jiang L, Cheng Q (2020) Strong sequentially bridged MXene sheets. Proc Natl Acad Sci 117, 27154-27161. https://doi.org/10.1073/pnas.2009432117

39. Zhao Y, Wu R, Hao Y, Zhao Y, Zhang X, Liu H, Zhai W, Dai K, Pan C, Liu C, Shen C (2025) Eco‐friendly multifunctional hydrogel sensors enabledsustainable and accurate human‐machine interaction system. Adv Mater 37, 2507127. https://doi.org/10.1002/adma.202507127

40. Feng S, Xu G, Deng P, Guo Q, Yi Y, Chen B, Gu Z, Sporrer L, Laval-Schmidt PA, Lu C, Zhou Z (2025) Screen‐printed multifunctional anti‐counterfeiting MXene-based device with ultra‐fast on‐demand degradability. Adv Funct Mater, e20258.

41. Li W, Zhou T, Zhang Z, Li L, Lian W, Wang Y, Lu J, Yan J, Wang H, Wei L, Cheng Q (2024) Ultrastrong MXene film induced by sequential bridging with liquid metal. Science 385, 62-68. https://doi.org/doi:10.1126/science.ado4257
